# Supplementary material for: Hyperexcitability of Sensory Neurons in Fragile X Mouse Model
Source: Front Mol Neurosci. 2021 Dec 22;14:796053. doi: 10.3389/fnmol.2021.796053 (PMC8727524; doi:10.3389/fnmol.2021.796053)
Supplement: Supplementary file 1 [file Table_1.XLSX]

## Sheet: Statistics data for all Figures
Table S1. Statistics data for all Figures
Figure 1	Current step (pA)	Genotype	mean ± SEM	Number of cells tested	P value (t-test)		Cells tested were from independent cultures of 3-4 mice for each condition.
Figure 1B Latency (ms)	50	WT	237.69 ± 67.74	8	0.00225
		KO	49.66 ± 8.1	13
	75	WT	114.83 ± 12.65	14	1.014e-05
		KO	29.02 ± 9.35	14
	100	WT	70.98 ± 11.09	15	0.000185
		KO	17.94 ± 4.42	14
	125	WT	71.57 ± 11.97	15	9.0027e-05
		KO	12.89 ± 3.12	14
	150	WT	50.45 ± 9.23	15	2.871e-05
		KO	8.34 ± 1.69	13
Figure 1C Rheobase charge (pC)	50	WT	11.88 ± 3.39	8	0.00225
		KO	2.48 ± 0.41	13
	75	WT	8.61 ± 0.95	14	1.01422e-05
		KO	2.18 ± 0.7	14
	100	WT	7.1 ± 1.11	15	0.000185087
		KO	1.79 ± 0.44	14
	125	WT	8.95 ± 1.5	15	9.00275e-05
		KO	1.61 ± 0.39	14
	150	WT	7.57 ± 1.38	15	0.000287102
		KO	1.25 ± 0.25	13
Figure 1D Threshold (mV)	50	WT	-10.78 ± 1.5	9	5.849e-05
		KO	-18.97 ± 0.86	13
	75	WT	-10.74 ± 1.12	16	9.819e-06
		KO	-18.78 ± 0.95	14
	100	WT	-9.71 ± 1.14	15	<0.00001
		KO	-19.33 ± 1	14
	125	WT	-8.95 ± 1.27	15	<0.00001
		KO	-19.54 ± 1.14	14
	150	WT	-8.74 ± 1.63	15	2.4929e-05
		KO	-21.54 ± 1.92	13
Figure 1E Number of APs	50	WT	0.81 ± 0.28	17	5.1028e-05
		KO	3.85 ± 0.62	14
	75	WT	4.18 ± 0.69	17	0.01149
		KO	7.8 ± 1.22	14
	100	WT	8.65 ± 1.05	17	0.26203
		KO	10.72 ± 1.52	14
	125	WT	11.64 ± 1.28	17	0.69805
		KO	12.48 ± 1.79	14
	150	WT	14.28 ± 1.47	17	0.87309
		KO	14.68 ± 2.09	14
Figure 1F First inter-AP interval (ms)	50	WT	144.16 ± 21.48	7	0.000973372
		KO	73.84 ± 6.6	13
	75	WT	105.04 ± 28.73	15	0.0481
		KO	53.65 ± 7.4	14
	100	WT	101.66 ± 27.81	17	0.04029
		KO	35.43 ± 2.82	14
	125	WT	74.24 ± 20.07	17	0.04563
		KO	27.81 ± 1.51	14
	150	WT	77.99 ± 19.9	17	0.0195
		KO	23.53 ± 1.28	14
Figure 2	Current step (pA)	Genotype	mean± SEM	Number of cells tested	P value (t-test)
Figure 2A AP rising speed (mV/ms)	50	WT	59.38 ± 10.08	9	0.6219
		KO	69.28 ± 14.81	13
	75	WT	55.5 ± 6.22	16	0.36777
		KO	69.51 ± 14.76	14
	100	WT	58.44 ± 6.47	17	0.48193
		KO	69.45 ± 15.17	14
	125	WT	56.69 ± 6.64	17	0.30079
		KO	72.69 ± 14.7	14
	150	WT	55.93 ± 6.93	17	0.25701
		KO	73.68 ± 14.71	14
Figure 2B AP rising time (ms)	50	WT	1.22 ± 0.08	9	0.41141
		KO	1.12 ± 0.09	13
	75	WT	1.29 ± 0.09	15	0.23245
		KO	1.14 ± 0.08	14
	100	WT	1.33 ± 0.13	16	0.24953
		KO	1.15 ± 0.09	14
	125	WT	1.32 ± 0.12	16	0.08819
		KO	1.15 ± 0.09	14
	150	WT	1.42 ± 0.15	16	0.97194
		KO	1.14 ± 0.09	12
Figure 2C AP peak potential (mV)	50	WT	37.47 ± 2.64	8	0.95389
		KO	37.74 ± 3.38	11
	75	WT	36.33 ± 1.69	14	0.36565
		KO	38.85 ± 2.2	12
	100	WT	37.33 ± 1.71	15	0.886852
		KO	36.82 ± 2.63	12
	125	WT	37.52 ± 1.8	15	0.50039
		KO	39.51 ± 2.37	12
	150	WT	37.22 ± 2.01	15	0.55253
		KO	39.18 ± 2.63	12
Figure 2D AP amplitude (mV)	50	WT	53.74 ± 2.05	6	0.52909
		KO	57.31 ± 3.89	11
	75	WT	51.17 ± 2.26	11	0.06128
		KO	58.37 ± 2.8	12
	100	WT	52.69 ± 2.89	12	0.34611
		KO	56.84 ± 3.2	12
	125	WT	55.12 ± 4.32	12	0.37575
		KO	59.96 ± 3.16	12
	150	WT	57.66 ± 5.86	12	0.34148
		KO	64.51 ± 3.91	12
Figure 2E AP duration (ms)	50	WT	1.76 ± 0.2	9	0.16036
		KO	1.42 ± 0.11	10
	75	WT	1.7 ± 0.1	15	0.15046
		KO	1.48 ± 0.1	11
	100	WT	1.77 ± 0.1	16	0.07945
		KO	1.5 ± 0.1	11
	125	WT	1.79 ± 0.1	16	0.08055
		KO	1.54 ± 0.09	11
	150	WT	1.78 ± 0.1	16	0.20957
		KO	1.59 ± 0.1	11
Figure 2F AP falling time (ms)	50	WT	1.29 ± 0.14	7	0.4885
		KO	1.45 ± 0.15	10
	75	WT	1.56 ± 0.2	14	0.48751
		KO	1.38 ± 0.16	11
	100	WT	1.59 ± 0.18	15	0.37032
		KO	1.38 ± 0.14	11
	125	WT	1.61 ± 0.18	15	0.4753
		KO	1.43 ± 0.14	11
	150	WT	1.62 ± 0.21	15	0.8181
		KO	1.56 ± 0.13	11
Figure 3	Parameters	Genotype	mean± SEM	Number of cells tested	P value (t-test)
Figure 3C	Number of APs	WT	5.42 ± 0.6	12	0.013696
		KO	9.82 ± 1.58	11
	Threshold (mV)	WT	-12.6 ± 0.75	12	0.00146
		KO	-16.41 ± 0.71	11
	Rheobase (pA)	WT	83.6 ± 5.48	25	<0.00001
		KO	44.73 ± 4.28	21
	Normalized Rheobase (pA/pF)	WT	3.94 ± 0.38	25	<0.00001
		KO	2.15 ± 0.21	21
Figure 3D	Diameter (mm)	WT	19.14 ± 0.53	35	0.35875
		KO	19.84 ± 0.54	31
	Capacitance (pF)	WT	23.6 ± 1.33	35	0.99479
		KO	23.61 ± 1.46	31
	RMP (mV)	WT	-45.34 ± 1.37	35	0.60298
		KO	-46.38 ± 1.42	31
	Input resistance (MW)	WT	368.03 ± 22.26	35	0.00968
		KO	485.33 ± 39.01	31
Figure 4 B-C	Current step (pA)	Genotype	mean± SEM	Number of cells tested	P value (t-test)
Figure 4B Voltage sag (mV)	-50	WT	12.52 ± 2.27	7	5.3929e-05
		KO	2.51 ± 0.56	8
	-60	WT	14.64 ± 2.8	7	0.00253
		KO	3.8 ± 1.21	8
	-70	WT	18.16 ± 2.88	7	0.000773982
		KO	4.91 ± 1.33	8
	-80	WT	20.57 ± 2.62	7	0.00032727
		KO	6.45 ± 1.51	8
	-90	WT	23.08 ± 2.94	7	0.00059159
		KO	8.2 ± 1.73	8
	-100	WT	25.22 ± 3.21	7	0.00131
		KO	9.89 ± 2.12	8
Figure 4C Sag ratio	-50	WT	0.26 ± 0.04	7	0.0002514
		KO	0.08 ± 0.01	8
	-60	WT	0.26 ± 0.04	7	0.00224
		KO	0.1 ± 0.02	8
	-70	WT	0.3 ± 0.03	7	0.0004093
		KO	0.11 ± 0.02	8
	-80	WT	0.32 ± 0.03	7	0.0002089
		KO	0.13 ± 0.02	8
	-90	WT	0.33 ± 0.03	7	0.0003344
		KO	0.15 ± 0.02	8
	-100	WT	0.34 ± 0.03	7	0.0008899
		KO	0.17 ± 0.03	8
Figure 4 D-G	Treatment	Genotype	mean± SEM	Number of cells tested	P value (t-test)
Figure 4D Input resistance (MW)	Basal	WT	409.81 ± 13.94	6	0.00151
		KO	568.62 ± 35.27	5
	ZD7288	WT	648.3 ± 53.65	6	0.7302
		KO	678.11 ± 60.81	8
Figure 4E Number of APs	Basal	WT	4.43 ± 1.13	5	0.00584
		KO	10.63 ± 1.26	5
	ZD7288	WT	11.66 ± 2.59	5	0.77984
		KO	12.43 ± 1.44	5
Figure 4F Threshhold (mV)	Basal	WT	-10.83 ± 1.52	5	0.00397
		KO	-16.95 ± 0.88	5
	ZD7288	WT	-18.37 ± 1.12	5	0.94219
		KO	-18.48 ± 0.97	5
Figure 4G Rheobase (pA)	Basal	WT	86.92 ± 15.75	5	0.00722
		KO	42.41 ± 4.39	5
	ZD7288	WT	36.85 ± 5.13	5	0.4987
		KO	33.09 ± 2.87	5
Figure 4H	Hcn subtype	Genotype	mean± SEM	Number of mice tested	P value (t-test)
Figure 4H Relative mRNA expression of HCN subtypes	Hcn1	WT	1.00 ± 0.00	3	0.00178
		KO	0.36 ± 0.09	3
	Hcn2	WT	1.00 ± 0.00	3	0.78265
		KO	0.96 ± 0.12	3
	Hcn3	WT	1.00 ± 0.00	3	0.31503
		KO	1.62 ± 0.54	3
	Hcn4	WT	1.00 ± 0.00	3	0.00043
		KO	0.53 ± 0.04	3
Resting membrane potentail (RMP)		Genotype	mean± SEM	Number of cells tested	P value (t-test)
RMP of cells for voltage sag analysis (mV)		WT	-48.75 ± 0.04	7	0.51651
		KO	-49.66 ± 1.21	8
Figure S1	Treatment	Genotype	mean± SEM	Number of cells tested	P value (t-test)
Figure S1A Threshold (mV)	Basal	WT	-9.79 ± 1.33	5	0.0003
		KO	-19.88 ± 1.18	6
	XE991	WT	-8.6 ± 1.98	5	0.0117
		KO	-17.9 ± 2.12	6
Figure S1B Rheobase charge (pC)	Basal	WT	6.12 ± 0.79	5	0.00029
		KO	1.82 ± 0.23	6
	XE991	WT	5.35 ± 0.68	5	<0.00001
		KO	0.93 ± 0.13	6
